# Supplementary material for: Food Sources and Expenditures for Seafood in the United States
Source: Nutrients. 2020 Jun 17;12(6):1810. doi: 10.3390/nu12061810 (PMC7353403; doi:10.3390/nu12061810)
Supplement: Supplementary file 1 [file nutrients-12-01810-s001.pdf]

# Supplementary

## Food Sources and Expenditures for Seafood in the United States

David C. Love <sup>1,2,\*</sup>, Frank Asche <sup>3,4</sup>, Zach Conrad <sup>5</sup>, Ruth Young <sup>1,6</sup>, Jamie Harding <sup>1,2</sup>, Elizabeth M. Nussbaumer <sup>1,2</sup>, Andrew L. Thorne-Lyman <sup>1,2,7</sup> and Roni Neff <sup>1,2</sup>

<sup>1</sup> Johns Hopkins Center for a Livable Future, Johns Hopkins University, Baltimore, MD 21202, USA; ruth.young@jhu.edu (R.Y.); jhardi14@jhu.edu (J.H.); enussba4@jhu.edu (E.N.); andrewtl@gmail.com (A.L.T.-L.); rneff1@jhu.edu (R.N.)

<sup>2</sup> Department of Environmental Health and Engineering, Bloomberg School of Public Health, Johns Hopkins University, Baltimore, MD 21205, USA

<sup>3</sup> Institute for Sustainable Food Systems and School of Forest Resources and Conservation, University of Florida, Gainesville, FL 32611, USA; Frank.asche@ufl.edu

<sup>4</sup> Department of Industrial Economics, University of Stavanger, Stavanger, Norway

<sup>5</sup> Department of Health Sciences, William & Mary, Williamsburg, VA 23185, USA; zsconrad@wm.edu

<sup>6</sup> Department of International Health, Bloomberg School of Public Health, Johns Hopkins University, Baltimore, MD 21205, USA

<sup>7</sup> Center for Human Nutrition, Department of International Health, Bloomberg School of Public Health, Johns Hopkins University, Baltimore, MD 21205, USA

\* Correspondence: dlove8@jhu.edu

### List of Supplementary Tables and Figures:

**Table S1.** US Department of Agriculture “food at home” (FAH) and “food away from home” (FAFH) codes. [1].

**Table S2.** Top seafood species consumed by United States adult seafood consumers ( $\geq$  age 19) by food source (NHANES 2007 to 2016).

**Table S3.** Top seafood species consumed by United States seafood consumers (all ages) by food source (NHANES 2007 to 2016).

**Table S4.** Usual fish consumption rates (g/day raw weight, edible portion) of total fish and shellfish. 50th percentile estimates (range: 95% CI). [2].

**Figure 1.** Seafood consumption rates (g/d, raw weight, edible portion) by county for each coastal/inland region described in Table S4

**Table S1.** US Department of Agriculture “food at home” (FAH) and “food away from home” (FAFH) codes. [1].

| Code | Description                                  | FAH or FAFH                          |
|------|----------------------------------------------|--------------------------------------|
| 1    | Store - grocery/supermarket                  | FAH                                  |
| 2    | Restaurant with waiter/waitress              | FAFH                                 |
| 3    | Restaurant fast food/pizza                   | FAFH                                 |
| 4    | Bar/tavern/lounge                            | FAFH                                 |
| 5    | Restaurant no additional information         | FAFH                                 |
| 6    | Cafeteria NOT in a K-12 school               | FAFH                                 |
| 7    | Cafeteria in a K-12 school                   | FAFH                                 |
| 8    | Child/Adult care center                      | FAFH                                 |
| 9    | Child/Adult home care                        | FAFH                                 |
| 10   | Soup kitchen/shelter/food pantry             | FAH if eaten at home; otherwise FAFH |
| 11   | Meals on Wheels                              | FAFH                                 |
| 12   | Community food program - other               | FAH if eaten at home; otherwise FAFH |
| 13   | Community program no additional information  | FAH if eaten at home; otherwise FAFH |
| 14   | Vending machine                              | FAFH                                 |
| 15   | Common coffee pot or snack tray              | FAFH                                 |
| 16   | From someone else/gift                       | FAFH                                 |
| 17   | Mail order purchase                          | FAH                                  |
| 18   | Residential dining facility                  | FAFH                                 |
| 19   | Grown or caught by you or someone you know   | FAH                                  |
| 20   | Fish caught by you or someone you know       | FAH                                  |
| 24   | Sport, recreation, or entertainment facility | FAFH                                 |
| 25   | Street vendor, vending truck                 | FAFH                                 |
| 26   | Fundraiser sales                             | FAFH                                 |
| 27   | Store - convenience type                     | FAFH                                 |
| 28   | Store - no additional info                   | FAFH                                 |
| 91   | Other, specify                               | FAFH                                 |
| 99   | Don't know                                   | FAFH                                 |
| .    | Missing                                      | FAFH                                 |

**Table S2.** Top seafood species consumed by United States adult seafood consumers ( $\geq$  age 19) by food source (NHANES 2007 to 2016).

| <b>Food Source<br/>(metric tons/day <math>\pm</math> SE)</b> | <b>Salmon</b> | <b>Shrimp</b> | <b>Canned Tuna</b> | <b>Fish</b>  | <b>Tilapia</b> | <b>Catfish</b> | <b>Cod</b>  | <b>Crab</b> | <b>Flounder</b> | <b>Seafood</b> |
|--------------------------------------------------------------|---------------|---------------|--------------------|--------------|----------------|----------------|-------------|-------------|-----------------|----------------|
| Store                                                        | 412 $\pm$ 54  | 251 $\pm$ 27  | 406 $\pm$ 34       | 216 $\pm$ 19 | 314 $\pm$ 52   | 83 $\pm$ 32    | 69 $\pm$ 17 | 46 $\pm$ 12 | 44 $\pm$ 11     | 49 $\pm$ 8     |
| Restaurant                                                   | 136 $\pm$ 25  | 272 $\pm$ 26  | 64 $\pm$ 12        | 159 $\pm$ 18 | 35 $\pm$ 7     | 82 $\pm$ 15    | 67 $\pm$ 14 | 81 $\pm$ 16 | 41 $\pm$ 14     | 35 $\pm$ 6     |
| Self-caught                                                  | 27 $\pm$ 25   | 13 $\pm$ 6    | -                  | 4 $\pm$ 2    | 14 $\pm$ 8     | 20 $\pm$ 13    | 4 $\pm$ 2   | 4 $\pm$ 3   | 9 $\pm$ 6       | -              |
| Gift                                                         | 26 $\pm$ 9    | 29 $\pm$ 5    | 14 $\pm$ 3         | 45 $\pm$ 10  | 15 $\pm$ 8     | 9 $\pm$ 2      | 7 $\pm$ 1   | 8 $\pm$ 5   | -               | 3 $\pm$ 2      |
| Institution                                                  | 17 $\pm$ 10   | 10 $\pm$ 4    | 6 $\pm$ 3          | 4 $\pm$ 1    | 11 $\pm$ 6     | 5 $\pm$ 3      | 7 $\pm$ 5   | 2 $\pm$ 2   | 2 $\pm$ 1       | 2 $\pm$ 2      |
| Bar, sports, rec facility                                    | 1.3 $\pm$ 1.3 | 6 $\pm$ 3     | 1 $\pm$ 1          | 4 $\pm$ 3    | -              | 11 $\pm$ 10    | 2 $\pm$ 2   | -           | 0.5 $\pm$ 0.5   | 0.1 $\pm$ 0.1  |
| Soup kitchen, com food prog                                  | 0.7 $\pm$ 0.7 | 0.8 $\pm$ 0.8 | 5 $\pm$ 3          | 2 $\pm$ 1    | -              | 0.3 $\pm$ 0.2  | 2 $\pm$ 2   | -           | -               | -              |
| Other                                                        | 1 $\pm$ 0.9   | 7 $\pm$ 6     | 4 $\pm$ 3          | 4 $\pm$ 1    | 2 $\pm$ 2      | 2.3 $\pm$ 1.6  | 5 $\pm$ 4   | 2 $\pm$ 2   | 0.5 $\pm$ 0.5   | 1 $\pm$ 1      |
| Don't know                                                   | 3 $\pm$ 2     | 0.5 $\pm$ 0.4 | -                  | 2 $\pm$ 1    | 0.9 $\pm$ 0.6  | -              | -           | 1 $\pm$ 1   | -               | 0.1 $\pm$ 0.1  |
| <b>Food Source<br/>(% by source)</b>                         | <b>Salmon</b> | <b>Shrimp</b> | <b>Canned Tuna</b> | <b>Fish</b>  | <b>Tilapia</b> | <b>Catfish</b> | <b>Cod</b>  | <b>Crab</b> | <b>Flounder</b> | <b>Seafood</b> |
| Store                                                        | 66%           | 43%           | 81%                | 49%          | 80%            | 39%            | 43%         | 32%         | 45%             | 54%            |
| Restaurant                                                   | 22%           | 46%           | 13%                | 36%          | 9%             | 39%            | 41%         | 57%         | 43%             | 39%            |
| Self-caught                                                  | 4%            | 2%            | 0%                 | 1%           | 3%             | 10%            | 2%          | 3%          | 9%              | 0%             |
| Gift                                                         | 4%            | 5%            | 3%                 | 10%          | 4%             | 4%             | 4%          | 5%          | 0%              | 3%             |
| Institution                                                  | 3%            | 2%            | 1%                 | 1%           | 3%             | 2%             | 5%          | 1%          | 2%              | 3%             |
| Bar, sports, rec facility                                    | 0%            | 1%            | 0%                 | 1%           | 0%             | 5%             | 1%          | 0%          | 0%              | 0%             |
| Soup kitchen, comm food prog                                 | 0%            | 0%            | 1%                 | 0%           | 0%             | 0%             | 1%          | 0%          | 0%              | 0%             |
| Other                                                        | 0%            | 1%            | 1%                 | 1%           | 1%             | 1%             | 3%          | 1%          | 1%              | 1%             |
| Don't know                                                   | 1%            | 0%            | 0%                 | 0%           | 0%             | 0%             | 0%          | 1%          | 0%              | 0%             |
| TOTAL                                                        | 100%          | 100%          | 100%               | 100%         | 100%           | 100%           | 100%        | 100%        | 100%            | 100%           |

**Table S3.** Top seafood species consumed by United States seafood consumers (all ages) by food source (NHANES 2007 to 2016).

| <b>Food Source<br/>(metric tons/day <math>\pm</math> SE)</b> | <b>Salmon</b> | <b>Shrimp</b> | <b>Canned<br/>Tuna</b> | <b>Fish</b>  | <b>Tilapia</b> | <b>Catfish</b>  | <b>Cod</b>  | <b>Crab</b> | <b>Flounder</b> | <b>Seafood</b>  |
|--------------------------------------------------------------|---------------|---------------|------------------------|--------------|----------------|-----------------|-------------|-------------|-----------------|-----------------|
| Store                                                        | 438 $\pm$ 55  | 278 $\pm$ 28  | 459 $\pm$ 36           | 265 $\pm$ 22 | 355 $\pm$ 52   | 86 $\pm$ 33     | 79 $\pm$ 18 | 52 $\pm$ 13 | 51 $\pm$ 12     | 61 $\pm$ 9      |
| Restaurant                                                   | 140 $\pm$ 25  | 297 $\pm$ 26  | 70 $\pm$ 13            | 182 $\pm$ 21 | 42 $\pm$ 8     | 84 $\pm$ 15     | 68 $\pm$ 14 | 88 $\pm$ 16 | 42 $\pm$ 14     | 39 $\pm$ 6      |
| Self-caught                                                  | 29 $\pm$ 25   | 15 $\pm$ 7    | 0.1 $\pm$ 0.1          | 7 $\pm$ 3    | 14 $\pm$ 8     | 23 $\pm$ 13     | 4 $\pm$ 2   | 4 $\pm$ 4   | 9 $\pm$ 6       | -               |
| Gift                                                         | 28 $\pm$ 9    | 34 $\pm$ 6    | 18 $\pm$ 4             | 52 $\pm$ 10  | 16 $\pm$ 8     | 11 $\pm$ 3      | 7 $\pm$ 1   | 9 $\pm$ 5   | -               | -               |
| Institution                                                  | 18 $\pm$ 10   | 11 $\pm$ 4    | 9 $\pm$ 3              | 13 $\pm$ 3   | 12 $\pm$ 6     | 5 $\pm$ 3       | 10 $\pm$ 5  | 2 $\pm$ 1   | 2 $\pm$ 1       | 2 $\pm$ 2       |
| Bar, sports, rec facility                                    | 1 $\pm$ 1     | 6 $\pm$ 3     | 1 $\pm$ 1              | 4 $\pm$ 3    | -              | 11 $\pm$ 10     | 2 $\pm$ 2   | -           | 1 $\pm$ 1       | 0.08 $\pm$ 0.08 |
| Soup kitchen, com food prog                                  | 1 $\pm$ 1     | 1 $\pm$ 1     | 6 $\pm$ 3              | 2 $\pm$ 1    | -              | 0.3 $\pm$ 0.2   | 2 $\pm$ 2   | -           | -               | -               |
| Other                                                        | 1 $\pm$ 1     | 7 $\pm$ 6     | 4 $\pm$ 3              | 4 $\pm$ 2    | 2 $\pm$ 2      | 2 $\pm$ 2       | 5 $\pm$ 4   | 2 $\pm$ 2   | 1 $\pm$ 1       | 1 $\pm$ 1       |
| Don't know                                                   | 4 $\pm$ 3     | 1 $\pm$ 0.4   | -                      | 2 $\pm$ 1    | 1 $\pm$ 1      | 0.04 $\pm$ 0.04 | -           | 1 $\pm$ 1   | -               | 0.05 $\pm$ 0.05 |
| <b>Food Source (%)</b>                                       | <b>Salmon</b> | <b>Shrimp</b> | <b>Canned<br/>Tuna</b> | <b>Fish</b>  | <b>Tilapia</b> | <b>Catfish</b>  | <b>Cod</b>  | <b>Crab</b> | <b>Flounder</b> | <b>Seafood</b>  |
| Store                                                        | 66%           | 43%           | 81%                    | 50%          | 80%            | 39%             | 45%         | 33%         | 49%             | 57%             |
| Restaurant                                                   | 21%           | 46%           | 12%                    | 34%          | 9%             | 38%             | 39%         | 56%         | 40%             | 37%             |
| Self-caught                                                  | 4%            | 2%            | 0%                     | 1%           | 3%             | 10%             | 2%          | 2%          | 9%              | 0%              |
| Gift                                                         | 3%            | 2%            | 2%                     | 3%           | 3%             | 2%              | 6%          | 1%          | 2%              | 2%              |
| Institution                                                  | 0%            | 1%            | 0%                     | 1%           | 0%             | 5%              | 1%          | 0%          | 0%              | 0%              |
| Bar, sports, rec facility                                    | 0%            | 0%            | 1%                     | 0%           | 0%             | 0%              | 1%          | 0%          | 0%              | 0%              |
| Soup kitchen, com food prog                                  | 0%            | 1%            | 1%                     | 1%           | 0%             | 1%              | 3%          | 1%          | 0%              | 1%              |
| Other                                                        | 4%            | 5%            | 3%                     | 10%          | 4%             | 5%              | 4%          | 6%          | 0%              | 3%              |
| Don't know                                                   | 1%            | 0%            | 0%                     | 0%           | 0%             | 0%              | 0%          | 0%          | 0%              | 0%              |
| TOTAL                                                        | 100%          | 100%          | 100%                   | 100%         | 100%           | 100%            | 100%        | 100%        | 100%            | 100%            |

**Table S4.** Usual fish consumption rates (g/day raw weight, edible portion) of total fish and shellfish. 50th percentile estimates (range: 95% CI). [2].

| <b>Geographic Area</b>       | <b>Adults<br/>21 yr and older</b> | <b>Youth<br/>&lt;21 yr</b> |
|------------------------------|-----------------------------------|----------------------------|
| <b>Region</b>                |                                   |                            |
| Northeast                    | 23.9 (20 - 28.7)                  | 5.7 (4.1 - 7.8)            |
| Midwest                      | 12.9 (10.6 - 15.6)                | 3.3 (2.5 - 4.3)            |
| South                        | 17.6 (15.1 - 20.4)                | 5.7 (4.2 - 7.7)            |
| West                         | 20 (17.1 - 23.4)                  | 5.9 (4.1 - 8.7)            |
| <b>Coastal Status</b>        |                                   |                            |
| Noncoastal                   | 15.9 (13.7 - 18.5)                | 4.5 (3.5 - 5.7)            |
| Coastal                      | 20.9 (18.4 - 23.7)                | 5.9 (4.7 - 7.4)            |
| <b>Coastal/Inland Region</b> |                                   |                            |
| Pacific                      | 22.1 (18.2 - 26.7)                | 5.9 (4.3 - 8.1)            |
| Atlantic                     | 24.5 (20.7 - 28.9)                | 7.2 (5.4 - 9.6)            |
| Gulf of Mexico               | 19 (15.2 - 23.8)                  | 7 (4.3 - 11.5)             |
| Great Lakes                  | 14.6 (12.1 - 17.5)                | 3.9 (2.9 - 5.2)            |
| Inland Northeast             | 22.1 (17.5 - 28)                  | 5.1 (3.6 - 7.2)            |
| Inland Midwest               | 12.4 (10.1 - 15.1)                | 3.1 (2.3 - 4.1)            |
| Inland South                 | 15.6 (13.1 - 18.4)                | 4.9 (3.7 - 6.4)            |
| Inland West                  | 18.4 (15.1 - 22.5)                | 6.0 (3.5 - 10.1)           |

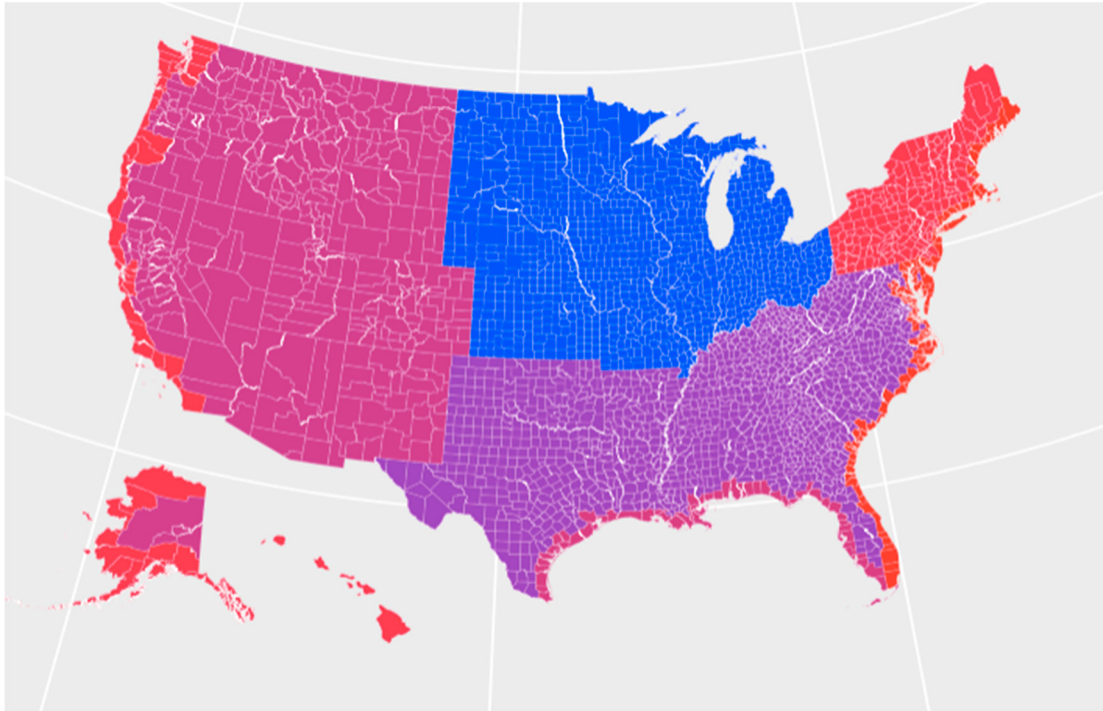

**Figure 1.** Seafood consumption rates (g/d, raw weight, edible portion) by county for each coastal/inland region described in Table S4.

## References

1. Lin, B.-H.; Anekwe, T.D.; Buzby, J.C.; Bentley, J. *US Food Commodity Availability by Food Source, 1994–2008*; US Department of Agriculture, Economic Research Service: Washington, DC, USA, 2016.
2. EPA. *Estimated Fish Consumption Rates for the U.S. Population and Selected Subpopulations (NHANES 2003–2010)*; EPA-820-R-14-002; U.S. Environmental Protection Agency Report an Environmental: Washington, DC, USA, 2014.
